# Supplementary material
Source: PubMed Central journal article supplement (PMC8460608)
Supplement: NIHMS1728792-supplement-supinfo.pdf [file NIHMS1728792-supplement-supinfo.pdf]

## Supplementary Information

### The Rgg1518 transcriptional regulator is a necessary facet of sugar metabolism and virulence in *Streptococcus pneumoniae*

Bushra Shlla<sup>1,2</sup>, Ozcan Gazioglu<sup>1</sup>, Sulman Shafeeq<sup>3</sup>, Irfan Manzoor<sup>3</sup>, Oscar P. Kuipers<sup>3</sup>, Andrew Ulijasz<sup>4</sup>,<sup>i</sup> N. Luisa Hiller<sup>5</sup>, Peter W. Andrew<sup>1</sup>, and Hasan Yesilkaya<sup>1\*</sup>

<sup>1</sup>Department of Respiratory Sciences, University of Leicester, Leicester, LE1 7RH, UK,

<sup>2</sup>Department of Biology, College of Science, University of Mosul, Mosul, Iraq.

<sup>3</sup>Molecular Genetics, University of Groningen, Nijenborgh 7, 9747 AG, Groningen, The Netherlands.

<sup>4</sup>Department of Microbiology and Immunology, Loyola University Chicago, Maywood, IL, USA

<sup>5</sup>Department of Biological Sciences, Carnegie Mellon University, Pittsburgh, PA 15213

\*Author of correspondence

[hy3@le.ac.uk](mailto:hy3@le.ac.uk), +441162231401

**Key words:** *Streptococcus pneumoniae*, transcriptional regulation, Rgg, sugar metabolism, capsule synthesis, virulence

**Running title:** Rgg 1518 is required for pneumococcal virulence and survival

**Contents:**

STable 1

STable 2

STable 3

STable 4

SFigure 1

SFigure 2

SFigure 3

**STable 1.** Microarray analysis of *Δrgg1518* in comparison with wild type D39 grown in CDM supplemented with galactose. The analysis used three independent cultures grown to mid-exponential phase (OD595 of 0.380).

| Locus tag                               | Name   | Fold <sup>a</sup> | Gene Name                                                           | Motif 1* |
|-----------------------------------------|--------|-------------------|---------------------------------------------------------------------|----------|
| <b>Downregulated in <i>Δrgg1518</i></b> |        |                   |                                                                     |          |
| SPD_0036                                |        | -2.19             | hypothetical protein                                                |          |
| SPD_0058                                | purD   | -2.48             | phosphoribosylamine--glycine ligase                                 |          |
| SPD_0059                                | purE   | -2.22             | phosphoribosylaminoimidazole carboxylase, catalytic subunit         | +        |
| SPD_0105                                |        | -2.21             | hypothetical protein                                                |          |
| SPD_0141                                |        | -2.19             | hypothetical protein                                                |          |
| SPD_0143                                |        | -2.17             | UDP-glucose 6-dehydrogenase, putative                               |          |
| SPD_0163                                |        | -2                | hypothetical protein                                                | +        |
| SPD_0167                                | ribB   | -2.15             | 3,4-dihydroxy-2-butanone 4-phosphate synthase/GTP cyclohydrolase II |          |
| SPD_0223                                |        | -2.12             | iron(III) ABC transporter, permease protein                         |          |
| SPD_0224                                |        | -2                | iron(III) ABC transporter, permease protein                         |          |
| SPD_0228                                |        | -2.25             | transcriptional regulator, AraC family protein                      | +        |
| SPD_0276                                |        | -2.6              | hypothetical protein                                                |          |
| SPD_0293                                |        | -2.09             | PTS system, IIA component                                           | +        |
| SPD_0364                                |        | -2.09             | ABC-type polar amino acid transport system, ATPase component        |          |
| SPD_0372                                |        | -2.09             | sodium:alanine symporter family protein                             |          |
| SPD_0424                                |        | -2.04             | PTS system, cellobiose-specific IIC component                       | +        |
| SPD_0425                                |        | -2.41             | hypothetical protein                                                |          |
| SPD_0426                                | lacF-1 | -2.81             | PTS system, lactose-specific IIA component                          |          |
| SPD_0449                                |        | -2.03             | hypothetical protein                                                |          |
| SPD_0470                                | blpC   | -2.01             | peptide pheromone BlpC                                              | +        |
| SPD_0496                                |        | -2.33             | cell filamentation protein Fic-related protein                      |          |
| SPD_0509                                |        | -2.07             | hypothetical protein                                                |          |
| SPD_0520                                |        | -2.21             | transposase, putative, truncation                                   |          |
| SPD_0527                                |        | -2.36             | oxidoreductase, putative                                            |          |
| SPD_0531                                |        | -2                |                                                                     | +        |
| SPD_0573                                | msrAB2 | -2                | peptide methionine sulfoxide reductase msrA/msrB 2                  |          |
| SPD_0592                                | rsuA-2 | -2.33             | ribosomal small subunit pseudouridine synthase A                    |          |
| SPD_0603                                |        | -2.14             | peptidase, M50 family protein                                       |          |
| SPD_0613                                |        | -2.28             | hypothetical protein                                                |          |
| SPD_0616                                |        | -2.36             | amino acid ABC transporter, ATP-binding protein                     |          |
| SPD_0626                                |        | -2.17             | ABC transporter, ATP-binding protein                                | +        |
| SPD_0640                                |        | -2.33             |                                                                     |          |
| SPD_0647                                |        | -2.05             | transcriptional regulator, TetR family protein                      |          |
| SPD_0744                                |        | -2.26             |                                                                     |          |

|          |      |       |                                                               |   |
|----------|------|-------|---------------------------------------------------------------|---|
| SPD_0772 |      | -2.32 | 1-phosphofructokinase, putative                               |   |
| SPD_0843 | celA | -2.09 | competence protein CelA                                       |   |
| SPD_0891 |      | -2.15 |                                                               | + |
| SPD_0893 |      | -2.14 | hypothetical protein                                          |   |
| SPD_0903 | xylH | -2.03 | 4-oxalocrotonate tautomerase                                  |   |
| SPD_0929 |      | -2    | hypothetical protein                                          |   |
| SPD_0938 |      | -2.34 | hypothetical protein                                          |   |
| SPD_0942 |      | -2.27 | hypothetical protein                                          |   |
| SPD_0945 |      | -2.13 | AMP-binding enzyme, putative                                  |   |
| SPD_0946 |      | -2.06 | hypothetical protein                                          |   |
| SPD_0951 |      | -2.07 | hypothetical protein                                          |   |
| SPD_1035 |      | -2.1  | hypothetical protein                                          |   |
| SPD_1182 |      | -2.07 | hypothetical protein                                          |   |
| SPD_1254 |      | -2.38 | hypothetical protein                                          |   |
| SPD_1257 |      | -2.32 | hypothetical protein                                          |   |
| SPD_1261 |      | -2.18 | hypothetical protein                                          |   |
| SPD_1266 |      | -2.13 | hypothetical protein                                          |   |
| SPD_1271 |      | -2.13 | hypothetical protein                                          |   |
| SPD_1322 |      | -2.04 | hypothetical protein                                          |   |
| SPD_1325 |      | -2.57 |                                                               |   |
| SPD_1354 |      | -2.13 | hypothetical protein                                          | + |
| SPD_1424 | truA | -2.29 | tRNA pseudouridine synthase A                                 |   |
| SPD_1470 |      | -2.01 | hypothetical protein                                          |   |
| SPD_1471 |      | -2.1  | hypothetical protein                                          |   |
| SPD_1503 |      | -2.25 | hypothetical protein                                          |   |
| SPD_1518 |      | -2.07 | transcriptional activator, Rgg/GadR/MutR family protein       |   |
| SPD_1587 |      | -2.13 | transcriptional activator, putative                           |   |
| SPD_1599 | trpC | -2.05 | indole-3-glycerol phosphate synthase                          |   |
| SPD_1611 |      | -2.17 | hypothetical protein                                          |   |
| SPD_1614 |      | -2.24 | phosphate transport system regulatory protein PhoU, putative  |   |
| SPD_1677 | rafE | -2.08 | sugar ABC transporter, sugar-binding protein                  |   |
| SPD_1711 |      | -2.23 | single-strand binding protein family protein                  |   |
| SPD_1731 |      | -2.01 | hypothetical protein                                          |   |
| SPD_1733 |      | -2.22 | hypothetical protein                                          |   |
| SPD_1750 | wrbA | -2.13 | multimeric flavodoxin WrbA (general function prediction only) |   |
| SPD_1789 |      | -2.01 | cell wall surface anchor family protein                       |   |
| SPD_1796 |      | -2.11 | L-asparaginase, putative                                      |   |
| SPD_1798 |      | -2    | DNA-binding response regulator                                |   |
| SPD_1855 |      | -2.17 | hypothetical protein                                          |   |
| SPD_1901 |      | -2    | transposase, putative                                         |   |
| SPD_1917 |      | -2.12 | hypothetical protein                                          |   |
| SPD_1974 |      | -2.06 | hypothetical protein                                          |   |
| SPD_1980 |      | -2.34 |                                                               |   |

|                                                  |      |       |                                                |   |
|--------------------------------------------------|------|-------|------------------------------------------------|---|
| SPD_1985                                         |      | -2.14 | alcohol dehydrogenase, iron-containing         |   |
| SPD_1987                                         |      | -2.24 | fucolectin-related protein                     |   |
| SPD_1989                                         |      | -2.09 | PTS system, IID component                      |   |
| <b>Upregulated in <math>\Delta</math>rgg1518</b> |      |       |                                                |   |
| SPD_0013                                         | ftsH | 2.82  | cell division protein FtsH                     |   |
| SPD_0017                                         |      | 4.48  |                                                | + |
| SPD_0020                                         |      | 2.89  |                                                |   |
| SPD_0021                                         |      | 2.28  |                                                |   |
| SPD_0047                                         |      | 3.46  | hypothetical protein                           |   |
| SPD_0064                                         |      | 2.62  | transcriptional regulator, GntR family protein |   |
| SPD_0091                                         |      | 2.74  | hypothetical protein                           | + |
| SPD_0100                                         |      | 2.38  |                                                |   |
| SPD_0113                                         |      | 5.88  |                                                | + |
| SPD_0114                                         |      | 7.19  | hypothetical protein                           |   |
| SPD_0115                                         |      | 8.53  | hypothetical protein                           |   |
| SPD_0116                                         |      | 2.09  | hypothetical protein                           |   |
| SPD_0117                                         |      | 2.33  | hypothetical protein                           |   |
| SPD_0118                                         |      | 2.46  | hypothetical protein                           |   |
| SPD_0120                                         |      | 2.47  | hypothetical protein                           |   |
| SPD_0121                                         |      | 2.82  | hypothetical protein                           | + |
| SPD_0123                                         |      | 3.6   | hypothetical protein                           |   |
| SPD_0124                                         |      | 2.41  | hypothetical protein                           |   |
| SPD_0126                                         | pspA | 2     | pneumococcal surface protein A                 | + |
| SPD_0145                                         |      | 3.39  | hypothetical protein                           |   |
| SPD_0146                                         |      | 3.66  | CAAX amino terminal protease family protein    |   |
| SPD_0147                                         |      | 2.74  | CAAX amino terminal protease family protein    |   |
| SPD_0148                                         |      | 2.27  | transporter, major facilitator family protein  |   |
| SPD_0150                                         |      | 2.57  | ABC transporter, substrate-binding protein     |   |
| SPD_0179                                         |      | 2.35  | lipoprotein, putative                          | + |
| SPD_0180                                         |      | 4.3   | hypothetical protein                           |   |
| SPD_0181                                         |      | 6.06  | conserved hypothetical protein TIGR00250       |   |
| SPD_0182                                         |      | 2.18  | hypothetical protein                           |   |
| SPD_0192                                         | rpsJ | 4.51  | ribosomal protein S10                          | + |
| SPD_0193                                         | rplC | 5.62  | ribosomal protein L3                           |   |
| SPD_0194                                         | rplD | 7.46  | ribosomal protein L4                           |   |
| SPD_0195                                         | rplW | 4.73  | ribosomal protein L23                          |   |
| SPD_0196                                         | rplB | 3.67  | ribosomal protein L2                           |   |
| SPD_0197                                         | rpsS | 6.72  | ribosomal protein S19                          |   |
| SPD_0198                                         | rplV | 8.56  | ribosomal protein L22                          |   |
| SPD_0199                                         | rpsC | 7.81  | ribosomal protein S3                           |   |
| SPD_0200                                         | rplP | 3.69  | ribosomal protein L16                          |   |
| SPD_0201                                         | rpmC | 7.17  | ribosomal protein L29                          |   |
| SPD_0202                                         | rpsQ | 8.11  | ribosomal protein S17                          |   |
| SPD_0203                                         | rplN | 6.94  | ribosomal protein L14                          | + |

|          |       |      |                                                                                     |   |
|----------|-------|------|-------------------------------------------------------------------------------------|---|
| SPD_0204 | rplX  | 5.41 | ribosomal protein L24                                                               |   |
| SPD_0205 | rplE  | 6.66 | ribosomal protein L5                                                                | + |
| SPD_0206 | rpsN  | 4.41 | ribosomal protein S14                                                               |   |
| SPD_0207 | rpsH  | 5.83 | ribosomal protein S8                                                                |   |
| SPD_0208 | rplF  | 4.77 | ribosomal protein L6                                                                |   |
| SPD_0209 | rplR  | 3.12 | ribosomal protein L18                                                               |   |
| SPD_0210 | rpsE  | 3.66 | ribosomal protein S5                                                                |   |
| SPD_0211 | rpmD  | 4.34 | ribosomal protein L30                                                               | + |
| SPD_0212 | rplO  | 4.82 | ribosomal protein L15                                                               |   |
| SPD_0213 | secY  | 2.66 | preprotein translocase, SecY subunit                                                |   |
| SPD_0215 | infA  | 4.94 | translation initiation factor IF-1                                                  |   |
| SPD_0216 | rpsM  | 3.89 | ribosomal protein S13                                                               | + |
| SPD_0217 | rpsK  | 4.22 | ribosomal protein S11                                                               |   |
| SPD_0218 | rpoA  | 3.43 | DNA-directed RNA polymerase, alpha subunit                                          |   |
| SPD_0219 | rplQ  | 8.71 | ribosomal protein L17                                                               | + |
| SPD_0244 | cdsA  | 2.08 | phosphatidate cytidylyltransferase                                                  |   |
| SPD_0251 | rpsL  | 5.28 | ribosomal protein S12                                                               |   |
| SPD_0252 | rpsG  | 4.74 | ribosomal protein S7                                                                | + |
| SPD_0253 | fusA  | 3    | translation elongation factor G                                                     |   |
| SPD_0256 |       | 2.18 | conserved hypothetical protein TIGR00053                                            |   |
| SPD_0257 |       | 2.9  | hypothetical protein                                                                |   |
| SPD_0263 | manM  | 2.59 | PTS system, mannose-specific IIC component                                          |   |
| SPD_0264 | manL  | 2.52 | PTS system, mannose-specific IIAB components                                        | + |
| SPD_0274 | rplM  | 3.17 | ribosomal protein L13                                                               |   |
| SPD_0275 | rpsI  | 3.25 | ribosomal protein S9                                                                |   |
| SPD_0314 |       | 2.01 |                                                                                     |   |
| SPD_0315 | cps2A | 5.86 | integral membrane regulatory protein Cps2A                                          | + |
| SPD_0316 | cps2B | 4.55 | tyrosine-protein phosphatase CpsB                                                   |   |
| SPD_0317 | cps2C | 6.36 | chain length determinant protein/polysaccharide export protein, MPA1 family protein |   |
| SPD_0318 | cps2D | 4.11 | tyrosine-protein kinase Cps2D cytosolic ATPase domain                               |   |
| SPD_0319 | cps2E | 2.5  | undecaprenylphosphate glucosephosphotransferase Cps2E                               |   |
| SPD_0320 | cps2T | 2.56 | glycosyl transferase, group 1 family protein, putative                              |   |
| SPD_0326 | cps2K | 4.05 | UDP-glucose 6-dehydrogenase, putative                                               |   |
| SPD_0327 | cps2P | 5.9  | UDP-galactopyranose mutase                                                          |   |
| SPD_0328 | cps2L | 5.44 | glucose-1-phosphate thymidyltransferase                                             |   |
| SPD_0329 | rfbC  | 3.9  | dTDP-4-dehydrorhamnose 3,5-epimerase, putative                                      |   |
| SPD_0330 | rfbB  | 2.96 | dTDP-glucose 4,6-dehydratase                                                        |   |
| SPD_0331 | rfbD  | 3.45 | dTDP-4-dehydrorhamnose reductase                                                    |   |
| SPD_0332 |       | 2.28 |                                                                                     |   |
| SPD_0333 |       | 2.4  | hypothetical protein                                                                |   |
| SPD_0334 | aliA  | 4.26 | oligopeptide ABC transporter, oligopeptide-binding protein AliA                     | + |

|          |       |      |                                                             |   |
|----------|-------|------|-------------------------------------------------------------|---|
| SPD_0336 | pbp1A | 3.08 | penicillin-binding protein 1A                               |   |
| SPD_0337 | recU  | 4.58 | recombination protein U                                     |   |
| SPD_0342 |       | 2.02 | hypothetical protein                                        |   |
| SPD_0343 | gnd   | 2.51 | 6-phosphogluconate dehydrogenase, decarboxylating           |   |
| SPD_0344 |       | 2.85 | DNA-binding response regulator                              |   |
| SPD_0365 | tig   | 4.18 | trigger factor                                              |   |
| SPD_0378 |       | 3.32 | enoyl-CoA hydratase/isomerase family protein                | + |
| SPD_0379 |       | 4.45 | transcriptional regulator, MarR family protein              |   |
| SPD_0380 | fabH  | 7.19 | 3-oxoacyl-(acyl-carrier-protein) synthase III               |   |
| SPD_0381 | acpP  | 2.66 | acyl carrier protein                                        | + |
| SPD_0382 | fabK  | 4.54 | trans-2-enoyl-ACP reductase II                              |   |
| SPD_0383 | fabD  | 4.67 | malonyl CoA-acyl carrier protein transacylase               |   |
| SPD_0385 | fabF  | 2.96 | 3-oxoacyl-[acyl-carrier-protein] synthase II                |   |
| SPD_0387 | fabZ  | 3.61 | beta-hydroxyacyl-(acyl-carrier-protein) dehydratase FabZ    |   |
| SPD_0388 | accC  | 2.16 | acetyl-CoA carboxylase, biotin carboxylase                  |   |
| SPD_0389 | accD  | 2.88 | acetyl-CoA carboxylase, carboxyl transferase, beta subunit  | + |
| SPD_0390 | accA  | 2.72 | acetyl-CoA carboxylase, carboxyl transferase, alpha subunit |   |
| SPD_0394 |       | 2.56 | hypothetical protein                                        |   |
| SPD_0404 | ilvB  | 2.89 | acetolactate synthase, large subunit, biosynthetic type     | + |
| SPD_0406 | ilvC  | 2.83 | ketol-acid reductoisomerase                                 |   |
| SPD_0407 |       | 3.09 | hypothetical protein                                        |   |
| SPD_0408 |       | 2.08 | hypothetical protein                                        |   |
| SPD_0418 |       | 3.19 | hypothetical protein                                        |   |
| SPD_0420 | pflB  | 2.73 | formate acetyltransferase                                   |   |
| SPD_0448 | glnA  | 2.97 | glutamine synthetase, type I                                |   |
| SPD_0460 | dnaK  | 2.09 | chaperone protein DnaK                                      |   |
| SPD_0467 | blpS  | 2.43 | BlpS protein                                                |   |
| SPD_0550 | rplK  | 5.61 | ribosomal protein L11                                       | + |
| SPD_0551 | rplA  | 4.58 | ribosomal protein L1                                        |   |
| SPD_0554 |       | 2.09 | ABC transporter, ATP-binding protein                        |   |
| SPD_0556 |       | 2.1  | hypothetical protein                                        |   |
| SPD_0557 |       | 2.22 |                                                             |   |
| SPD_0560 |       | 2.11 | PTS system, IIB component, putative                         |   |
| SPD_0561 |       | 2.68 | PTS system, IIC component, putative                         |   |
| SPD_0562 | bgaA  | 2.13 | beta-galactosidase precursor, putative                      |   |
| SPD_0576 |       | 2    | conserved hypothetical protein TIGR01440                    |   |
| SPD_0577 | zmpB  | 2.42 | zinc metalloprotease ZmpB                                   | + |
| SPD_0593 |       | 2.34 | elongation factor Tu family protein                         |   |
| SPD_0594 |       | 2.1  | hypothetical protein                                        |   |
| SPD_0620 | lysS  | 2.28 | lysyl-tRNA synthetase                                       |   |
| SPD_0636 | spxB  | 2.02 | pyruvate oxidase                                            |   |

|          |      |      |                                                                                 |   |
|----------|------|------|---------------------------------------------------------------------------------|---|
| SPD_0650 | clpP | 2.4  | ATP-dependent Clp protease, proteolytic subunit ClpP                            | + |
| SPD_0652 | livJ | 2.06 | branched-chain amino acid ABC transporter, amino acid-binding protein           |   |
| SPD_0667 | sodA | 3.05 | superoxide dismutase, manganese-dependent                                       |   |
| SPD_0674 | rpsP | 2.89 | ribosomal protein S16                                                           |   |
| SPD_0690 |      | 2.61 | hypothetical protein                                                            |   |
| SPD_0705 |      | 2.16 | DnaQ family exonuclease/DinG family helicase, putative                          |   |
| SPD_0710 | ezrA | 2.48 | septation ring formation regulator EzrA                                         | + |
| SPD_0716 |      | 2.01 | IS630-Spn1, transposase Orf1                                                    |   |
| SPD_0721 | folD | 2.19 | methylenetetrahydrofolate dehydrogenase/methenyltetrahydrofolate cyclohydrolase |   |
| SPD_0724 | deoB | 2.32 | phosphopentomutase                                                              |   |
| SPD_0726 |      | 2.72 | purine nucleoside phosphorylase, family protein 2                               | + |
| SPD_0728 |      | 2.56 | hypothetical protein                                                            |   |
| SPD_0750 |      | 2.61 | hypothetical protein                                                            | + |
| SPD_0751 |      | 2.64 | hypothetical protein                                                            | + |
| SPD_0752 |      | 4.33 | hypothetical protein                                                            |   |
| SPD_0753 | pcp  | 2.59 | pyrrolidone-carboxylate peptidase                                               |   |
| SPD_0756 |      | 2.34 |                                                                                 |   |
| SPD_0757 | rpsA | 3.4  | ribosomal protein S1                                                            |   |
| SPD_0760 | dnaX | 2.14 | DNA polymerase III, gamma and tau subunits                                      |   |
| SPD_0762 | sufC | 2.4  | FeS assembly ATPase SufC                                                        |   |
| SPD_0763 | sufD | 3.61 | FeS assembly protein SufD                                                       |   |
| SPD_0764 | sufS | 5.72 | cysteine desulfurases, SufS subfamily protein                                   |   |
| SPD_0765 |      | 4.49 | SUF system FeS assembly protein, NifU family protein                            |   |
| SPD_0766 | sufB | 3.41 | FeS assembly protein SufB                                                       |   |
| SPD_0784 |      | 2.48 | type I restriction-modification system, R subunit, putative                     |   |
| SPD_0785 |      | 2.27 | hypothetical protein                                                            |   |
| SPD_0790 | pyk  | 2.45 | pyruvate kinase                                                                 | + |
| SPD_0835 | frf  | 3.8  | ribosome recycling factor                                                       |   |
| SPD_0838 |      | 2.52 | PhoH family protein                                                             |   |
| SPD_0847 | infC | 2.24 | translation initiation factor IF-3                                              |   |
| SPD_0848 | rpmI | 4.05 | ribosomal protein L35                                                           | + |
| SPD_0900 | asd  | 2.3  | aspartate-semialdehyde dehydrogenase                                            |   |
| SPD_0905 |      | 2.4  | acetyltransferase, GNAT family protein                                          |   |
| SPD_0913 |      | 2.66 | hypothetical protein                                                            | + |
| SPD_0959 |      | 2.81 | hypothetical protein                                                            |   |
| SPD_0968 |      | 2.66 | acetyltransferase, GNAT family protein                                          |   |
| SPD_0969 |      | 2.65 | hypothetical protein                                                            |   |
| SPD_0970 | map  | 2.21 | methionine aminopeptidase, type I                                               |   |
| SPD_0989 | rplU | 3.66 | ribosomal protein L21                                                           |   |
| SPD_0990 |      | 3.62 | hypothetical protein                                                            |   |



|          |        |      |                                                          |   |
|----------|--------|------|----------------------------------------------------------|---|
| SPD_0991 | rpmA   | 3.83 | ribosomal protein L27                                    |   |
| SPD_0996 |        | 2.04 | DegV family protein                                      | + |
| SPD_1014 |        | 2.27 | IS630-Spn1, transposase Orf1                             |   |
| SPD_1037 |        | 2.62 | histidine triad protein                                  |   |
| SPD_1039 | ptsI   | 2    | phosphoenolpyruvate-protein phosphotransferase           |   |
| SPD_1042 | nrdE   | 3.71 | ribonucleoside-diphosphate reductase, alpha subunit      |   |
| SPD_1049 | lacT   | 2.13 | transcription antiterminator LacT                        | + |
| SPD_1050 | lacD   | 4.14 | tagatose 1,6-diphosphate aldolase                        |   |
| SPD_1051 | lacC   | 3.57 | tagatose-6-phosphate kinase                              |   |
| SPD_1052 | lacB   | 3.46 | galactose-6-phosphate isomerase, LacB subunit            |   |
| SPD_1053 | lacA   | 4.73 | galactose-6-phosphate isomerase, LacA subunit            | + |
| SPD_1060 | lepA   | 2.32 | GTP-binding protein LepA                                 |   |
| SPD_1061 |        | 2.7  | serine/threonine protein phosphatase                     |   |
| SPD_1064 |        | 2.31 | hemolysin A, putative                                    |   |
| SPD_1078 | ldh    | 2.2  | L-lactate dehydrogenase                                  |   |
| SPD_1083 | vicX   | 3.29 | vicX protein                                             |   |
| SPD_1084 |        | 4.52 | sensory box sensor histidine kinase                      |   |
| SPD_1085 |        | 2.11 | DNA-binding response regulator                           |   |
| SPD_1099 |        | 2.46 | amino acid ABC transporter, ATP-binding protein          |   |
| SPD_1100 | zwf    | 2.33 | glucose-6-phosphate 1-dehydrogenase                      |   |
| SPD_1106 |        | 2.5  |                                                          |   |
| SPD_1125 | pck    | 2.78 | choline kinase                                           |   |
| SPD_1127 | ispD   | 3.22 | 2-C-methyl-D-erythritol 4-phosphate cytidyltransferase   | + |
| SPD_1158 | gdhA   | 2.03 | NADP-specific glutamate dehydrogenase                    | + |
| SPD_1175 |        | 2.07 | hypothetical protein                                     |   |
| SPD_1188 | rplJ   | 3.23 | ribosomal protein L10                                    |   |
| SPD_1193 | msrAB1 | 2.37 | peptide methionine sulfoxide reductase msrA/msrB 1       | + |
| SPD_1194 | thrB   | 2.15 | homoserine kinase                                        |   |
| SPD_1195 | hom    | 3.21 | homoserine dehydrogenase                                 |   |
| SPD_1206 |        | 2.31 | hypothetical protein                                     | + |
| SPD_1207 | tyrA   | 3.1  | prephenate dehydrogenase                                 |   |
| SPD_1228 |        | 2.33 | phosphate ABC transporter, ATP-binding protein, putative |   |
| SPD_1245 | rpsU   | 2.31 | ribosomal protein S21                                    |   |
| SPD_1246 | nagB   | 2.89 | glucosamine-6-phosphate isomerase                        |   |
| SPD_1268 |        | 3.5  | hypothetical protein                                     |   |
| SPD_1269 |        | 2    | hypothetical protein                                     | + |
| SPD_1290 |        | 2.56 | amino acid ABC transporter, permease protein             |   |
| SPD_1298 | nox    | 2.24 | NADH oxidase                                             |   |
| SPD_1309 | pgdA   | 2.26 | peptidoglycan GlcNAc deacetylase                         |   |
| SPD_1310 |        | 2.25 | hypothetical protein                                     | + |
| SPD_1318 | tuf    | 2.01 | translation elongation factor Tu                         |   |
| SPD_1319 |        | 2.37 | hypothetical protein                                     |   |

|          |        |      |                                                       |   |
|----------|--------|------|-------------------------------------------------------|---|
| SPD_1326 | pgm    | 2.27 | phosphoglucomutase/phosphomannomutase family protein  | + |
| SPD_1338 | atpH   | 4.53 | ATP synthase F1, delta subunit                        |   |
| SPD_1339 | atpF   | 4.65 | ATP synthase F0, B subunit                            |   |
| SPD_1340 | atpB   | 2.01 | ATP synthase F0, A subunit                            |   |
| SPD_1344 |        | 2.88 | hypothetical protein                                  | + |
| SPD_1346 |        | 2.63 | Uncharacterized BCR, putative                         |   |
| SPD_1349 | murC   | 2.04 | UDP-N-acetylmuramate--alanine ligase                  |   |
| SPD_1365 |        | 2.08 | hypothetical protein                                  |   |
| SPD_1368 | rpsR   | 3.31 | ribosomal protein S18                                 | + |
| SPD_1369 | ssb    | 2.9  | single-strand binding protein                         |   |
| SPD_1370 | rpsF   | 5.23 | ribosomal protein S6                                  |   |
| SPD_1400 |        | 2.26 | hypothetical protein                                  |   |
| SPD_1403 | lytC   | 2.07 | 1,4-beta-N-acetylmuramidase, putative                 |   |
| SPD_1404 | tpiA   | 3.33 | triosephosphate isomerase                             |   |
| SPD_1410 |        | 3.18 |                                                       |   |
| SPD_1439 | rpsO   | 2.35 | ribosomal protein S15                                 | + |
| SPD_1461 | psaB   | 3.72 | manganese ABC transporter, ATP-binding protein        |   |
| SPD_1462 | psaC   | 2.56 | manganese ABC transporter, permease protein, putative |   |
| SPD_1463 |        | 5.74 | ABC transporter, substrate binding lipoprotein        |   |
| SPD_1473 |        | 2.85 | hypothetical protein                                  |   |
| SPD_1474 | divIVA | 5.48 | cell division protein DivIVA                          |   |
| SPD_1475 | ylmH   | 2.85 | YlmH protein                                          |   |
| SPD_1477 | ylmF   | 2.63 | YlmF protein                                          |   |
| SPD_1479 | ftsZ   | 3.25 | cell division protein FtsZ                            |   |
| SPD_1480 | ftsA   | 2.63 | cell division protein FtsA                            |   |
| SPD_1512 | secA   | 2.64 | preprotein translocase, SecA subunit                  |   |
| SPD_1513 |        | 4.09 |                                                       |   |
| SPD_1514 |        | 9.48 | ABC transporter, ATP-binding protein                  |   |
| SPD_1515 |        | 8.42 | hypothetical protein                                  |   |
| SPD_1516 |        | 9.86 | hypothetical protein                                  |   |
| SPD_1517 |        | 4.67 | hypothetical protein                                  | + |
| SPD_1520 |        | 2.54 | nitroreductase family protein                         | + |
| SPD_1522 |        | 2.11 | hypothetical protein                                  |   |
| SPD_1524 |        | 5.06 | transcriptional regulator, GntR family protein        | + |
| SPD_1525 |        | 6.46 | ABC transporter, ATP-binding protein                  |   |
| SPD_1526 |        | 2.87 | hypothetical protein                                  | + |
| SPD_1542 |        | 2.23 | serine/threonine protein kinase                       |   |
| SPD_1554 |        | 2.3  | iojap-related protein                                 |   |
| SPD_1566 |        | 3.13 | hypothetical protein                                  |   |
| SPD_1581 |        | 2.88 |                                                       |   |
| SPD_1588 |        | 2.68 | hypothetical protein                                  | + |
| SPD_1626 | xth    | 2.36 | exodeoxyribonuclease III                              |   |
| SPD_1627 |        | 2.81 |                                                       |   |

|          |        |      |                                                                         |   |
|----------|--------|------|-------------------------------------------------------------------------|---|
| SPD_1633 | galT-2 | 2.03 | galactose-1-phosphate uridylyltransferase                               | + |
| SPD_1642 | proWX  | 2.08 | choline transporter (glycine betaine transport system permease protein) |   |
| SPD_1644 |        | 2.13 | hypothetical protein                                                    |   |
| SPD_1655 | scpB   | 2.47 | segregation and condensation protein B                                  |   |
| SPD_1667 | amiF   | 2.43 | oligopeptide ABC transporter, ATP-binding protein AmiF                  |   |
| SPD_1668 | amiE   | 3.23 | oligopeptide ABC transporter, ATP-binding protein AmiE                  |   |
| SPD_1669 | amiD   | 5.09 | oligopeptide ABC transporter, permease protein AmiD                     |   |
| SPD_1670 | amiC   | 2.38 | oligopeptide ABC transporter, permease protein AmiC                     |   |
| SPD_1671 | amiA   | 7.63 | oligopeptide ABC transporter, oligopeptide-binding protein AmiA         |   |
| SPD_1683 |        | 2.07 |                                                                         |   |
| SPD_1686 |        | 5.53 |                                                                         |   |
| SPD_1687 |        | 2.02 |                                                                         |   |
| SPD_1688 |        | 3.75 |                                                                         |   |
| SPD_1689 |        | 4.07 |                                                                         |   |
| SPD_1691 |        | 3.14 |                                                                         |   |
| SPD_1692 |        | 2.24 |                                                                         |   |
| SPD_1694 |        | 3.28 |                                                                         |   |
| SPD_1696 |        | 2.07 |                                                                         |   |
| SPD_1698 |        | 3.23 |                                                                         |   |
| SPD_1707 |        | 3.63 | hypothetical protein                                                    |   |
| SPD_1726 | ply    | 2.57 | pneumolysin                                                             |   |
| SPD_1727 |        | 4.81 | hypothetical protein                                                    | + |
| SPD_1728 |        | 2.13 | hypothetical protein                                                    |   |
| SPD_1730 |        | 2.1  |                                                                         |   |
| SPD_1737 | lytA   | 2.01 | autolysin/N-acetylmuramoyl-L-alanine amidase                            |   |
| SPD_1739 | recA   | 2.44 | recA protein                                                            |   |
| SPD_1795 |        | 2.4  | hypothetical protein                                                    |   |
| SPD_1870 |        | 2.06 |                                                                         |   |
| SPD_1879 |        | 2.46 |                                                                         |   |
| SPD_1898 |        | 2.69 | hypothetical protein                                                    |   |
| SPD_1939 |        | 2.07 | hypothetical protein                                                    |   |
| SPD_1942 |        | 2.36 | hypothetical protein                                                    |   |
| SPD_1949 |        | 2.6  | hypothetical protein                                                    |   |
| SPD_1955 |        | 2.08 | hypothetical protein                                                    |   |
| SPD_1963 | rpmF   | 4.87 | ribosomal protein L32                                                   | + |
| SPD_1983 |        | 3.41 | hypothetical protein                                                    |   |
| SPD_2011 | glpF   | 2.2  | glycerol uptake facilitator protein                                     |   |
| SPD_2012 | glpO   | 4.02 | alpha-glycerophosphate oxidase                                          |   |
| SPD_2013 | glpK   | 4.35 | glycerol kinase                                                         |   |
| SPD_2016 |        | 2.1  | TIM-barrel protein, nifR3 family protein, putative                      |   |
| SPD_2020 |        | 2.27 | DNA-binding response regulator                                          |   |

|          |      |      |                                  |   |
|----------|------|------|----------------------------------|---|
| SPD_2032 |      | 2.73 | DHH subfamily 1 protein          |   |
| SPD_2041 | tsf  | 2.99 | translation elongation factor Ts |   |
| SPD_2042 | rpsB | 4.98 | ribosomal protein S2             | + |
| SPD_2066 |      | 2.6  |                                  |   |
| SPD_2068 |      | 5.84 | serine protease                  |   |
| SPD_2069 |      | 2.55 | SpoJ protein                     |   |
|          | engB | 2.58 |                                  |   |
|          | glmM | 2.4  |                                  |   |
|          | ppnK | 2.03 |                                  |   |
|          | tpx  | 2.17 |                                  |   |

<sup>a</sup>FOLD  $\geq 2$  or  $\leq -2.0$  ( $\Delta$ *rgg1518* compared with D39 wild type). All P-values are  $<0.001$ . \*indicates

the list of genes containing motif 1 identified in the regulatory region of SPD\_0315.

**STable 2** .Microarray analysis of *Δ**rgg1518* in comparison with wild type D39 grown in CDM supplemented with mannose. The analysis used three independent cultures grown to mid-exponential phase (OD595 of 0.380).

| Locus                                          | Name  | FOLD <sup>a</sup> | Function                                          | Motif 1* |
|------------------------------------------------|-------|-------------------|---------------------------------------------------|----------|
| <b>Downregulated in <i>Δ</i><i>rgg1518</i></b> |       |                   |                                                   |          |
| SPD_0316                                       | cps2B | -2.09             | tyrosine-protein phosphatase CpsB                 |          |
| SPD_1149                                       | crcB1 | -1.98             | CrcB protein                                      |          |
| SPD_0395                                       | efp   | -2.07             | translation elongation factor P                   |          |
|                                                | engB  | -2.18             |                                                   |          |
| SPD_0343                                       | gnd   | -2                | 6-phosphogluconate dehydrogenase, decarboxylating |          |
|                                                | groEL | -2.2              |                                                   |          |
| SPD_0458                                       | hrcA  | -2.01             | heat-inducible transcription repressor HrcA       |          |
| SPD_1053                                       | lacA  | -2.72             | galactose-6-phosphate isomerase, LacA subunit     | +        |
| SPD_1052                                       | lacB  | -4.21             | galactose-6-phosphate isomerase, LacB subunit     |          |
| SPD_1050                                       | lacD  | -3.45             | tagatose 1,6-diphosphate aldolase                 |          |
| SPD_1246                                       | nagB  | -2.19             | glucosamine-6-phosphate isomerase                 |          |
| SPD_0542                                       | pepV  | -2.06             | dipeptidase PepV                                  |          |
| SPD_0420                                       | pflB  | -3.23             | formate acetyltransferase                         |          |
| SPD_1461                                       | psaB  | -2.27             | manganese ABC transporter, ATP-binding protein    |          |
| SPD_0550                                       | rplK  | -2.2              | ribosomal protein L11                             | +        |
| SPD_0989                                       | rplU  | -3.16             | ribosomal protein L21                             |          |
| SPD_1245                                       | rpsU  | -1.98             | ribosomal protein S21                             |          |
| SPD_0021                                       |       | -1.92             |                                                   |          |
| SPD_0104                                       |       | -2.62             | LysM domain protein                               |          |

|                                                  |      |        |                                                            |   |
|--------------------------------------------------|------|--------|------------------------------------------------------------|---|
| SPD_0114                                         |      | -2.11  | hypothetical protein                                       |   |
| SPD_0116                                         |      | -2.64  | hypothetical protein                                       |   |
| SPD_0146                                         |      | -2.02  | CAAX amino terminal protease family protein                |   |
| SPD_0182                                         |      | -1.9   | hypothetical protein                                       | + |
| SPD_0418                                         |      | -2.02  | hypothetical protein                                       |   |
| SPD_0557                                         |      | -1.95  |                                                            |   |
| SPD_0765                                         |      | -2.3   | SUF system FeS assembly protein, NifU family protein       |   |
| SPD_0913                                         |      | -2.34  | hypothetical protein                                       | + |
| SPD_0990                                         |      | -2.24  | hypothetical protein                                       |   |
| SPD_1290                                         |      | -2.31  | amino acid ABC transporter, permease protein               |   |
| SPD_1291                                         |      | -2.69  | ArsC family protein                                        |   |
| SPD_1293                                         |      | -2.01  | acetyltransferase, GNAT family protein                     |   |
| SPD_1402                                         |      | -2.22  | non-heme iron-containing ferritin                          |   |
| SPD_1473                                         |      | -1.91  | hypothetical protein                                       |   |
| SPD_1513                                         |      | -3.58  |                                                            |   |
| SPD_1514                                         |      | -6.35  | ABC transporter, ATP-binding protein                       |   |
| SPD_1515                                         |      | -2.93  | hypothetical protein                                       |   |
| SPD_1516                                         |      | -5.31  | hypothetical protein                                       |   |
| SPD_1517                                         |      | -11.04 | hypothetical protein                                       | + |
| SPD_1566                                         |      | -1.97  | hypothetical protein                                       |   |
| SPD_1834                                         |      | -2.3   | alcohol dehydrogenase, iron-containing                     |   |
| SPD_1962                                         |      | -2.3   | hypothetical protein                                       |   |
| SPD_0764                                         | sufS | -2.14  | cysteine desulfurases, SufS subfamily protein              |   |
| SPD_1567                                         | trx  | -2.86  | thioredoxin                                                |   |
| SPD_2041                                         | tsf  | -1.97  | translation elongation factor Ts                           |   |
| <b>Upregulated in <math>\Delta</math>rgg1518</b> |      |        |                                                            |   |
| SPD_0373                                         |      | 1.98   | hypothetical protein                                       |   |
| SPD_0489                                         |      | 1.92   | hypothetical protein                                       |   |
| SPD_0519                                         |      | 2.06   | hypothetical protein                                       |   |
| SPD_0606                                         |      | 1.95   | hypothetical protein                                       |   |
| SPD_1170                                         |      | -1.5   | oligopeptide ABC transporter, oligopeptide-binding protein |   |
| SPD_1783                                         |      | 1.92   | hypothetical protein                                       |   |
| SPD_2054                                         | recF | 1.9    | recF protein                                               |   |

<sup>a</sup>FOLD  $\geq 2$  or  $\leq -2.0$  ( $\Delta$ rgg1518 compared with D39 wild type). All P-values are  $<0.001$ . \*indicates

the list of genes containing motif 1 identified in the regulatory region of SPD\_0315.

**STable 3.** The microbial strains and plasmids used in this study.

| <b>Strains</b>                        | <b>Purpose of using</b>                            | <b>Source</b>                   |
|---------------------------------------|----------------------------------------------------|---------------------------------|
| <i>S. pneumoniae</i>                  |                                                    |                                 |
| D39                                   | Serotype 2 strain                                  | Laboratory stock                |
| $\Delta$ rgg1518                      | D39, SPD1518, Spec resistant                       | This study                      |
| Empty pPP2-lacZ-wt                    | D39, pPP2-lacZ, Tetra resistant                    | This study                      |
| Prgg1518-lacZ-wt                      | D39, Prgg1518-lacZ, Tetra resistant                | This study                      |
| Prgg1518-lacZ- $\Delta$ rgg0999       | $\Delta$ rgg0999, Prgg0999-lacZ, Tetra resistant   | This study                      |
| Prgg1518-lacZ- $\Delta$ rgg1518       | $\Delta$ rgg1518, Prgg1518-lacZ, Tetra resistant   | This study                      |
| Prgg1518-lacZ- $\Delta$ rgg0144       | $\Delta$ rgg0144, Prgg1518-lacZ, Tetra resistant   | This study                      |
| Prgg1518-lacZ- $\Delta$ rgg0939       | $\Delta$ rgg0939, Prgg1518-lacZ, Tetra resistant   | This study                      |
| Pcps-lacZ-wt                          | D39, Pcps-lacZ, Tetra resistant                    | This study                      |
| Pcps-lacZ- $\Delta$ rgg1518           | $\Delta$ rgg1518, Pcps-lacZ, Tetra resistant       | This study                      |
| <i>Escherichia coli</i>               |                                                    |                                 |
| One Shot® TOP10                       | Plasmid propagation                                | Invitrogen, UK                  |
| One Shot® TOP10-rgg1518               | rgg1518-pcep Plasmid, Kan resistant                | This study                      |
| One Shot® TOP10-Prgg1518              | Prgg1518-pPP2 plasmid, Amp resistant               | This study                      |
| <i>E. coli</i> DH5 $\alpha$ - rgg1518 | Cloning rgg1518                                    | PROTEX, University of Leicester |
| BL21 (DE3) pLysS                      | Protein expression                                 | Agilent Tech, USA               |
| BL21 (DE3) pLysS-rgg1518              | pLEICS-01-rgg1518, Amp resistant                   | This study                      |
| <b>Plasmids</b>                       |                                                    |                                 |
| pCEP                                  | Genetic complementation, Kan resistant             | Guiral <i>et al.</i> , 2006     |
| pPP2                                  | lacZ transcriptional report, Amp & Tetra resistant | Halfman <i>et al.</i> , 2007    |
| pLEICS-01                             | protein expression, Amp resistant                  | PROTEX, UK                      |

**STable 4: The list of primers and peptides used in this study**

| <b>Primers ID</b>                      | <b>Mutagenesis primers</b>                  |
|----------------------------------------|---------------------------------------------|
| Spectinomycin/F                        | ATCGATTTTCGTTTCGTGAAT                       |
| Spectinomycin/R                        | GTTATGCAAGGGTTTATTGT                        |
| SPD01518UP/F                           | CACAGGTTGTTAACGATTCTCC                      |
| SPD1518UP/R                            | ATTCACGAACGAAAATCGATCATAATCCCATCTCATATTGTT  |
| SPD1518DOWN/F                          | ACAATAAACCCCTTGCATAACTTTTTCAAACCTATAATTTGTA |
| SPD1518DOWN/R                          | GAAAACAATTTAAAAGAGGAGG                      |
| <b>Sequencing primers</b>              |                                             |
| SPD1518-seqM/F1                        | CAAAGTAAGCAAGACATAAA                        |
| SPD1518-seqM/F2                        | ATCCCCAAAACCATGTTTCA                        |
| SPD1518-seqM/R1                        | GGAGCTATAGATACAGTCA                         |
| SPD1518-seqM/R2                        | TTGGTATGAATTGGTAACT                         |
| <b>Genetic Complementation primers</b> |                                             |
| SPD1518F <i>Nco</i> IC                 | CATGCCATGGTTTTCTGTTTCCTTTTCATT              |
| SPD1518R <i>Bam</i> HI                 | ACGGATCCTTATAGGTTTGAAAATCAT                 |
| MalF                                   | GCTTGAAAAGGAGTATACTT                        |
| PCEPR                                  | AGGAGACATTCCTTCCGTATC                       |
| <b>EMSA primers</b>                    |                                             |
| <i>Pcps</i> EMSA FAMF                  | ACACATCTGCTTCTAAAATA                        |
| <i>Pcps</i> EMSAR                      | GATTAACACCTATACATTGA                        |
| <i>gyrB</i> EMSAFAMF                   | ATGACAGAAGAAATCAAAAATCTGC                   |
| <i>gyrB</i> EMSAR                      | CCTGGACGCATACGAACAG                         |
| <i>Pcps</i> motif1UPR                  | TTTCACTATCTGCATCTTTA                        |
| <i>Pcps</i> motif 1downF               | TAGACATTACCGTAAAAAAG                        |
| <i>Pcps</i> motif 1downR               | TTCGCTTCACTTTCTGTGAA                        |
| <i>Pcps</i> motif 2UPR                 | TAATGTCTACACCTTTTTTC                        |
| <i>Pcps</i> motif 2downF               | AGTGATATAATCGTAAGATG                        |
| <i>Pcps</i> motif 2downR               | ACTATATTAACACTTCGCTT                        |
| <b>LacZ reporter primers</b>           |                                             |
| Fusion/UF                              | CTACTTGGAGCCACTATCGA                        |
| Fusion/DR                              | AGGCGATTAAGTTGGGTAAC                        |
| Fusion0999F <i>Sph</i> I               | GACGCATGCAGCTTTCTAGCTTGGTCAG                |
| Fusion0999R <i>Bam</i> HI              | ACGGGATCCC GTTCAATTTTATTAGCTTG              |
| Fusion1518F <i>Sph</i> I               | GACGCATGCAAGAAGATTCCTTATAACT                |
| Fusion1518R <i>Bam</i> HI              | ACGGGATCCTAAAATTTGTCCATAATCCC               |
| Fusion <i>cps</i> F <i>Sph</i> I       | GACGCATGCGATTATACCACATTGTGTAC               |
| Fusion <i>cps</i> R <i>Bam</i> HI      | ACGGGATCCAACGTGATTTTTTAAAACGTC              |
| <b>Cloning primers</b>                 |                                             |
| T7 Promoter-F                          | TAATACGACTCACTATAGGG                        |
| pLIECS-01-Seq-R                        | ATTAACATTAGTGGTGGTGGT                       |
| ProteinSPD1518F                        | TACTTCCAATCCATGAGATGGGATTATGGACAAAT         |
| ProteinSPD1518R                        | TATCCACCTTTACTGTCATAGGTTTGAAAATCATTAA       |
| <b>Peptides</b>                        |                                             |
| SHP1518-C12                            | IQLIWFETWFWG                                |
| SHP1518-C16                            | IWSWIQLIWFETWFWG                            |





SFigure 1

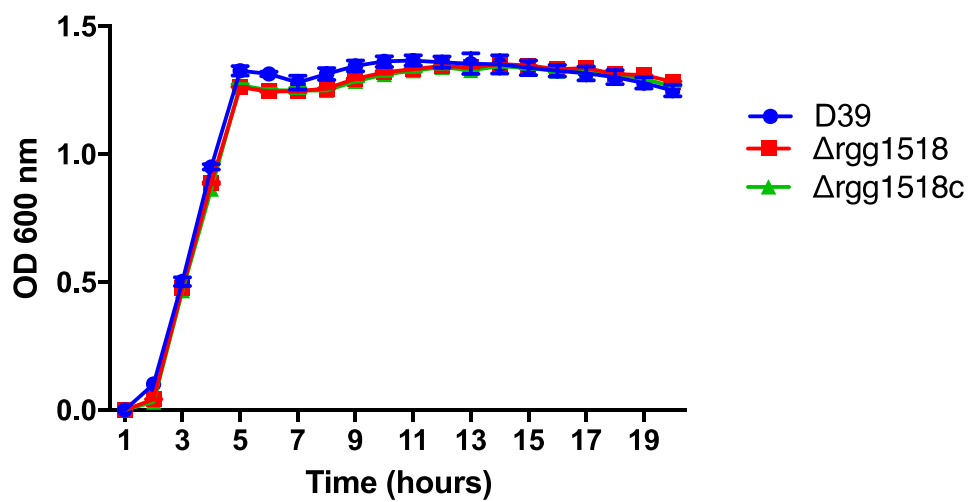

**SFigure 1:** The growth of pneumococcal strains in BHI under the microaerobic condition at 37°C. There was no difference in growth profiles of wild type D39, Rgg1518 mutant ( $\Delta$ rgg1518) and the genetically complemented mutant ( $\Delta$ rgg1518c). The experiment was repeated using 3 replicates of 6 independent biological samples. Error bar indicates standard error of mean.

## SFigure 2

P(SPD\_0315-SPD\_0328)

F →  
ACACATCTGCTTCTAAAAATTTGTTAGAAAACGATTGACTGTCCTGATCAATTTGTCATGTTCTTATTTCACTATATTTTTG  
GTTCCGCGGAAGTCTACTAAGATACCTTAAAGATGCAGATAGTGA AAAAAGGTG TAGACAATTACCGTAAAAAAGTGATATAATCGT  
AAGATGTTCAATGTATAGGTGTTAATC ←  
-35 -10  
R ←

P(SPD\_0378) -35 -10  
TTTTTCTTGCTTTCTGATCCTAAAAAGATATACTTTGACAGTGAAATAATTTAACACTCAATAAAAAATTAAGAGCAAACTAAG  
AAGCTAGACGAAGTCAGCTCAAAATACGTITTTGAGGTTGCAGATGGAAGCTGACGCGGTTTGAAGAGATTTTCGAAGAGTATAA  
ACTGCTTATAAAAAATAAAAGGAGCCCTG

P(SPD\_0126) -35 -10  
TCGAAAACTTGGAGGGATAAGAAATGAAAGTAAGACCACGGTCAAAACCAATTTGCGAATACTGTAAAGTTATTCGTCGTAATG  
GTCGTGTTATGGTAATTTGCCAGCAATCCAAAACACAAACAACGTC AAGGATAAGATAG AAAGGAGAAAAAC

P(SPD\_0113)  
AAAAATATTGTATCATAGCAATGTAAAAAGTAAAAAGAAAGTCGAAATAAATTTGTGAAAAAGTTAACGTAATTTTAAAAATG  
AGCTTAATAAGAGGTACTATGTAGGTAGAAAAATAAGATAGGAGAAAAAGTATGAAATAAAAAATAATTTGTATTCTAGTATGTA  
TTATAATTTGATTTAGTCTGGCTATAATCTTTCCATGGGGCTGGCCGATATAATGTAAGGGAGTTTGTAGTTGTTAAAGGAGGCTCAG  
TCCTT -35 -10

P(SPD\_1127)  
CTCTAAAAATTCGACGCCATTTATTAGTAATGCTACAGAATTCCTAGTCAITACTAGAAAATGGACTAGTTCTTTTGAATAATAGA  
ACTGCATAAATTCCTCTATTCTAGAAAGGGAGGACCAGTATTTCTTTATGATAGGACTAGATTGTTGGTATAAATAGAGAGAATAAGT  
TTTTTTAGTAAGACAAGGAGAAAAATG

P(SPD\_1634) -35 -35 -10 -10  
AATCCTCCTTGATTAGGTAGTATATCATATTTTTCGCTTTTTACTGATAGTTTAGTAAAAATTTTGTAAAAAGGATTGACCTTGG  
GAAATCCCTTGGATACAATAGAAAGAAAACGATTACACGTTAAGGTGGCTTAACGGACAGTC AAAGGAGAAAAATCAT

P(SPD\_1053) -35 -10  
AAAAAGTAAAAATAAATAACAAAAACAAACACAACTGTTGACTTCTTCAAACAATAGTAGTATAATTATGTTTGTGAGGACTAA  
TTGACTGTTTTTAAAGACAGCCAATACACTGCTGGAATCCAGCATAGAAAAATAAAAGGAGTATACAAT

P(SPD\_0208)  
AATCAAGATACAAAGCTCGTAAAGAACAAAGCAAAATTAGGAAGTTGGAGAAGTTGTTTACAAACAAGCCAACCTTATCTATTTT  
GCACAGTCTTAGATCGTGTTCAGTTCAGCTCTTGAACAAAATAGTATCTGAAACCCGTGAAAACCTGGCCGTTCTGGCCTGACAA  
TTTAAACAGGAGAAAAATAAAC -35 -10

P(SPD\_1461)  
TTTGTATTGTCATTATCTTAAACAAAAATCACTAGGGAATGCAATTAATAACCATTTAACTATTATTTTTAGCTATTATAAAAAAT  
CTTTCCATGATAAAACGCATAAATCCCAAGTTTTTACACTTGATACTATGCGTTTTATAATTTAGAAAATTTATCCGGAAGTTATCT  
TTAGAACTCTATTTTTCAGTTATTTTAAATTTTTTCAA AAAATTAACCTGACTTAATTTTTTTTTTAAATGTAATTAAGAGACAGGAG  
GAATACAAGT -35 -10

P(SPD\_0404) -10 -35  
GATTAATGAAGGACTGAGAAATCAGTTCITTTTTCTTTTTAGTAAATGAAATCGGTATCTTTTTAATAAAAAACAAAAATAACATT  
CATAAATAAAAGTTAAATAGAAAAATTCAGAAAATTTCTCTTTTATCTTGAAAAATTTTGAAAAAATGGTATGATAGTAACAAGT  
TATTTTTAAGAGGAAAAGAAAGGGGAATA

P(SPD\_1512) -10 -35  
AGTATCAATAAAGTCAGAGAGGTTAGCTTGGAACTAACCTCTTTTTCTTTTTCAAATGGGGATTCTTCTTGAAAATAATCAGT  
AATTGTCATAAAATTAAGGAACATTTCAAATAATCCGGAATTTAAAGTAAGGAAAAAC

P(SPD\_0193) -35 -10  
TCTAAAAATAAAAGAGCAGAGGCTGGTGTTCAACTCTAATTGAACACGGGCTAAACTCGGTGTGAAAAAGATAAACTTCTAGT  
GTCTGTAGACACTGCGTCAGTTTCTATTTTCACGTTGAGTTTGACGCCCTTTGTATCTTAGACTTGAGCATAAAAACGCTCGTT  
AAAAACTTTTTGAATAAAAAATATAGAAAAGGAACATTTTTCTC

P(SPD\_0122) -35 -10  
CTAGATATGGGTATTA AAAATGGAAAAAATTTTTGTTATTTTTTTTGTATGTCTATTTATATCATCCATAACTTTTTTAGCCCTATG  
ATTTTTGTAGCGAAGAAATAAAAAGTTTGATTATTGGATGAATGCGTTTTTTTTGATTTTAAATCATAGCAAATGATAATTTATCCAA  
AATTAAGAAAAATGATAAGGACACTGTAAAAAT

P(SPD\_1342) -35 -10  
GATAAATACCAGTTATAACCTAGAAAATTGTGCTTTCTAGACGATATTGAGGACAATATAATCGTAGCCCAAAATTAGGAATCA  
AGACTTATCAGGTTAAGAAAAGAGTGATGTTGTTGATAATTTAAACAATTTATTTAAACTAAAAACTCTCTATCTATTAATCCGA  
GATTCCTCCTCGGATTTTGTGTGCTTTCATTAATTTTACAGGTAAGACTTGC

## Motif 2

|          |            |         |            |
|----------|------------|---------|------------|
| SPD_0315 | GATAGTGAAA | AAAGGTG | TAGACATTAC |
| SPD_0378 | TATAAAATAA | AAAGGAG | CCCTG      |
| SPD_0126 | GATAAGATAG | AAAGGAG | AAAAC      |
| SPD_0113 | TTGAGTTGTT | AAAGGAG | GCTCAGTCCT |
| SPD_1127 | TTAGTAAGAC | AAAGGAG | AAAATAG    |
| SPD_1634 | ACGGACAGTC | AAAGGAG | AAATCAT    |
| SPD_1053 | GAAAAAATAA | AAAGGAG | TATACAAT   |
| SPD_0208 | TGACAATTTA | ACAGGAG | AAAATAAAC  |
| SPD_1461 | ATATTAAGAG | ACAGGAG | GAATACAAGT |
| SPD_0404 | AAGAGGAAAG | AAAGGGG | AATA       |
| SPD_1512 | TGCTAAAATT | AAAGGAA | CATTCTAAAA |
| SPD_0193 | AAAATATAGA | AAAGGAA | CTATTTTCTC |
| SPD_0122 | AAGAAATAAA | AAAGTTG | ATTATTTGGA |
| SPD_1342 | CATTAAATTT | ACAGGTA | AGACTTGCTA |

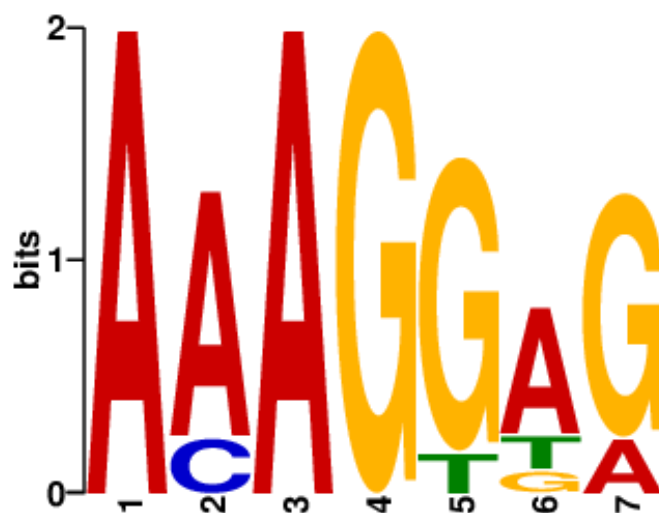

### Motif 1

B

|          |            |          |            |
|----------|------------|----------|------------|
| SPD_0315 | GTAGACATTA | CCGTAAAA | AAGTGATATA |
| SPD_0378 | GCTTTCTGAT | CCTAAAAA | AGATATACTT |
| SPD_0126 | TGGTAATTTG | CCCAGCAA | ATCCAAAACA |
| SPD_0113 | AATATTGTAT | CATAGCAA | TGTAAAAAGT |
| SPD_1127 | CCTAGTCATT | ACTAGAAA | TGGACTAGTT |
| SPD_1634 | AAAGGATTGA | CCTTGGGA | AATCCCTTGG |
| SPD_1053 | TGGAATCCAG | CATAGAAA | AAATAAAAAG |
| SPD_0208 | TATCTGAACC | CCGTGAAA | ACTGGCCGTT |
| SPD_1461 | TTGCATTTAT | CTTAACAA | AAATCACTAG |
| SPD_0404 | TCTTCTTTTA | TCTTGAAA | AATTTTGAAA |
| SPD_1512 | GGGGATTCTT | CCTTGAAA | ATAATCAGTA |
| SPD_0193 | TAGACTTGAG | CATAAAAA | ACGCTCGTTA |
| SPD_0122 | TGATTTTAAT | CATAGCAA | TGATAATTTA |
| SPD_1342 | CCAGTTATAA | CCTAGAAA | TTGTGTCTTT |

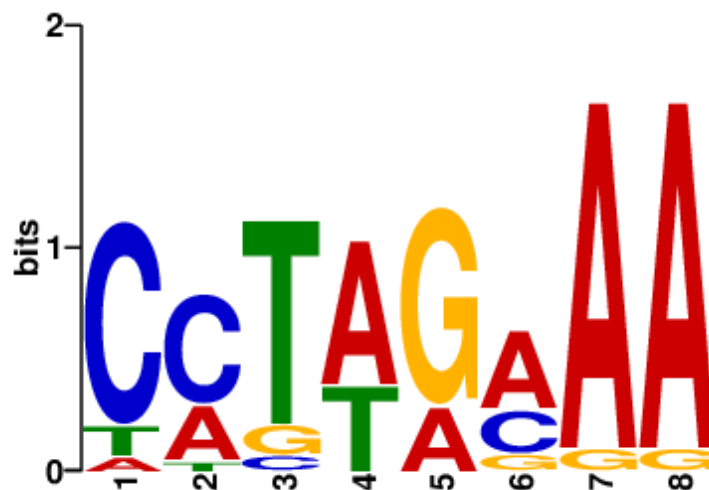

**Figure 2. Binding motif analysis for Rgg1518 (A)** The sequences of putative promoter regions of selected genes identified to be differentially expressed by microarray analysis used to identify a putative Rgg1518 binding motif using the MEME suite **(B)**. Two potential binding motives, Motif 1 and Motif 2, were identified. The genetic location of these binding motives in the promoter regions of genes are shown for motif 1 (blue) and motif 2 (red). The core promoter elements -10 and -35 are indicated.

**SFigure 3**

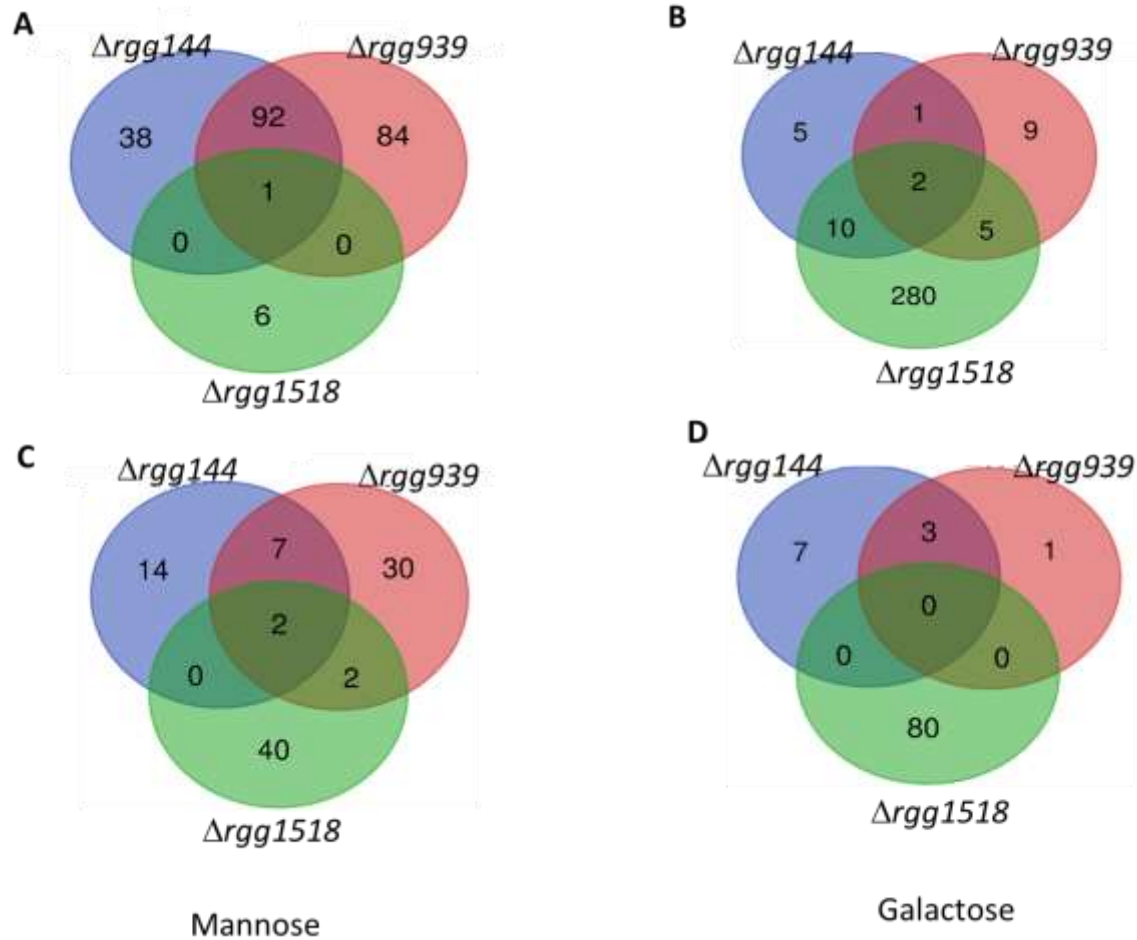

**SFigure 3:** A Venn diagram showing regulon overlap among different pneumococcal *Rggs* on mannose (A and C) and galactose (B and D). A and B illustrate the overlap of genes upregulated in *rgg* mutants, whereas C and D show downregulated genes relative to the wild type D39 strain. The diagram was generated by VENNY (<http://bioinfogp.cnb.csic.es/tools/venny/index.html>).

---

i
